# Supplementary material for: Quantifying wheat spike morphology by high resolution 3D surface scanning
Source: Plant Methods. 2026 Jun 15;22:55. doi: 10.1186/s13007-026-01550-5 (PMC13267510; doi:10.1186/s13007-026-01550-5)
Supplement: Supplementary file 4 — (xlsx 14 KB) [file 13007_2026_1550_MOESM4_ESM.xlsx]

## Sheet: TGW
					Year 2022						Year 2023
Plot ID	Replicate	Notes_Vis_Notes 2025-03-01	Notes_Vis_Notes 2025-03-02	Notes_Vis_Notes 2025-03-03	GRU code	Replicate	TGWc_TgwMeas_g	mean over replicates			Replicate	GRU code	Variety	TGWc_TgwMeas_g	mean over replicates		mean over years
633	1	1190093-1	1190093	93	WATDE0227	1	27.2461				1	WATDE0227	WAT-093	30.2703
1088	2	1190093-1	1190093	93	WATDE0227	2	27.5247				2	WATDE0227	WAT-093	30.3386
1982	3	1190093-1	1190093	93	WATDE0227	3	30.1308	28.3005			3	WATDE0227	WAT-093	30.26	30.2896		29.2951
216	1	1190094-1	1190094	94	WATDE0228	1	33.7921				1	WATDE0228	WAT-094	32.6624
1128	2	1190094-1	1190094	94	WATDE0228	2	31.9287				2	WATDE0228	WAT-094	33.182
1456	3	1190094-1	1190094	94	WATDE0228	3	33.6937	33.1382			3	WATDE0228	WAT-094	33.3243	33.0562		33.0972
406	1	1190117-1	1190117	117	WATDE0253	1	48.4555				1	WATDE0253	WAT-117	46.3421
756	2	1190117-1	1190117	117	WATDE0253	2	44.2162				2	WATDE0253	WAT-117
1550	3	1190117-1	1190117	117	WATDE0253	3	43.1882	45.2866			3	WATDE0253	WAT-117	44.2357	45.2889		45.2875
418	1	1190149-1	1190149	149	WATDE0020	1	41.6867				1	WATDE0020	WAT-149
746	2	1190149-1	1190149	149	WATDE0020	2	39.8841				2	WATDE0020	WAT-149	39.5404
1479	3	1190149-1	1190149	149	WATDE0020	3	38.3593	39.9767			3	WATDE0020	WAT-149	37.2828	38.4116		39.3506
466	1	1190156-1	1190156	156	WATDE0296	1	41.0431				1	WATDE0296	WAT-156	41.1922
839	2	1190156-1	1190156	156	WATDE0296	2	41.1417				2	WATDE0296	WAT-156
1494	3	1190156-1	1190156	156	WATDE0296	3	42.5197	41.5682			3	WATDE0296	WAT-156	42.2552	41.7237		41.6304
446	1	1190176-1	1190176	176	WATDE0323	1	36.0558				1	WATDE0323	WAT-176	35.6873
867	2	1190176-1	1190176	176	WATDE0323	2	37.648				2	WATDE0323	WAT-176	34.787
1881	3	1190176-1	1190176	176	WATDE0323	3	36.6528	36.7855			3	WATDE0323	WAT-176	36.4127	35.629		36.2072
514	1	1190196-4	1190196	196	WATDE0347	1	42.7578				1	WATDE0347	WAT-196
724	2	1190196-4	1190196	196	WATDE0347	2	42.5286				2	WATDE0347	WAT-196
1905	3	1190196-4	1190196	196	WATDE0347	3	42.1527	42.4797			3	WATDE0347	WAT-196	41.9851	41.9851		42.356
92	1	1190202-1	1190202	202	WATDE0354	1	36.5482				1	WATDE0354	WAT-202	37.0647
1373	2	1190202-1	1190202	202	WATDE0354	2	37.8184				2	WATDE0354	WAT-202	36.2465
2034	3	1190202-1	1190202	202	WATDE0354	3		37.1833			3	WATDE0354	WAT-202	36.5521	36.6211		36.846
538	1	1190325-1	1190325	325	WATDE0045	1	40.1814				1	WATDE0045	WAT-325	40.4213
894	2	1190325-1	1190325	325	WATDE0045	2	38.0981				2	WATDE0045	WAT-325	40.9212
1766	3	1190325-1	1190325	325	WATDE0045	3	40.638	39.6392			3	WATDE0045	WAT-325	41.7002	41.0142		40.3267
399	1	1190548-1	1190548	548	WATDE0748	1	55.9721				1	WATDE0748	WAT-548	57.3222
907	2	1190548-1	1190548	548	WATDE0748	2	53.889				2	WATDE0748	WAT-548	53.1235
1741	3	1190548-1	1190548	548	WATDE0748	3	53.9198	54.5937			3	WATDE0748	WAT-548	52.5328	54.3262		54.4599
					WATDE0930	1					1	WATDE0930	WAT-720	37.1134
				No datafor 720	WATDE0930	2					2	WATDE0930	WAT-720	35.3351
					WATDE0930	3		no data			3	WATDE0930	WAT-720	34.4904	35.6463		35.6463
Plot	rep	YearHarvested	Variety	Nrate	Paragon	1	38.7028				1	Paragon	Paragon	40.0264
104	1	2022	Paragon	100	Paragon	2	30.0735				2	Paragon	Paragon	40.2883
145	2	2022	Paragon	100	Paragon	3	32.6386	33.805			3	Paragon	Paragon	40.1025	40.139		36.972
351	3	2022	Paragon	100
102	1	2022	Paragon	200
135	2	2022	Paragon	200
305	3	2022	Paragon	200
3	1	2022	Paragon	350
200	2	2022	Paragon	350
326	3	2022	Paragon	350
